# Supplementary material for: Aging of the Spine: Characterizing genetic and physiological determinants of spinal curvature
Source: bioRxiv or medRxiv preprint supplement (doi:10.1101/2024.02.27.24303450), 2024-02-28

# Supplementary Figures

|                                                                                     |    |
|-------------------------------------------------------------------------------------|----|
| Supplementary Fig 1. Validation of annotator and ML model concordance               | 1  |
| Supplementary Fig 2. Correlation between kyphosis and lordosis angle                | 2  |
| Supplementary Fig 3. Sex-stratified comorbidity and spine curvature association     | 3  |
| Supplementary Fig 4. Nonlinear comorbidity and spine curvature association          | 4  |
| Supplementary Fig 5. Sex-stratified biochemistry and spine curvature association    | 5  |
| Supplementary Fig 6. Nonlinear musculoskeletal and spine curvature association      | 6  |
| Supplementary Fig 7. Adiposity and spine curvature association                      | 7  |
| Supplementary Fig 8. Sex-stratified musculoskeletal and spine curvature association | 8  |
| Supplementary Fig 9. GWAS (non-MTAG) with fine-mapping for spine curvature          | 9  |
| Supplementary Fig 10. PheWAS of significant loci                                    | 10 |

**Supplementary Figure 1. Annotator and ML Model Concordance on Validation Set for Lordosis and Kyphosis Cobb Angles.** H1-H4 are human annotators. H.Mean = Annotator Mean Angle, ML = Machine Learning Cobb Angle. Correlation coefficients are shown in the upper triangles.

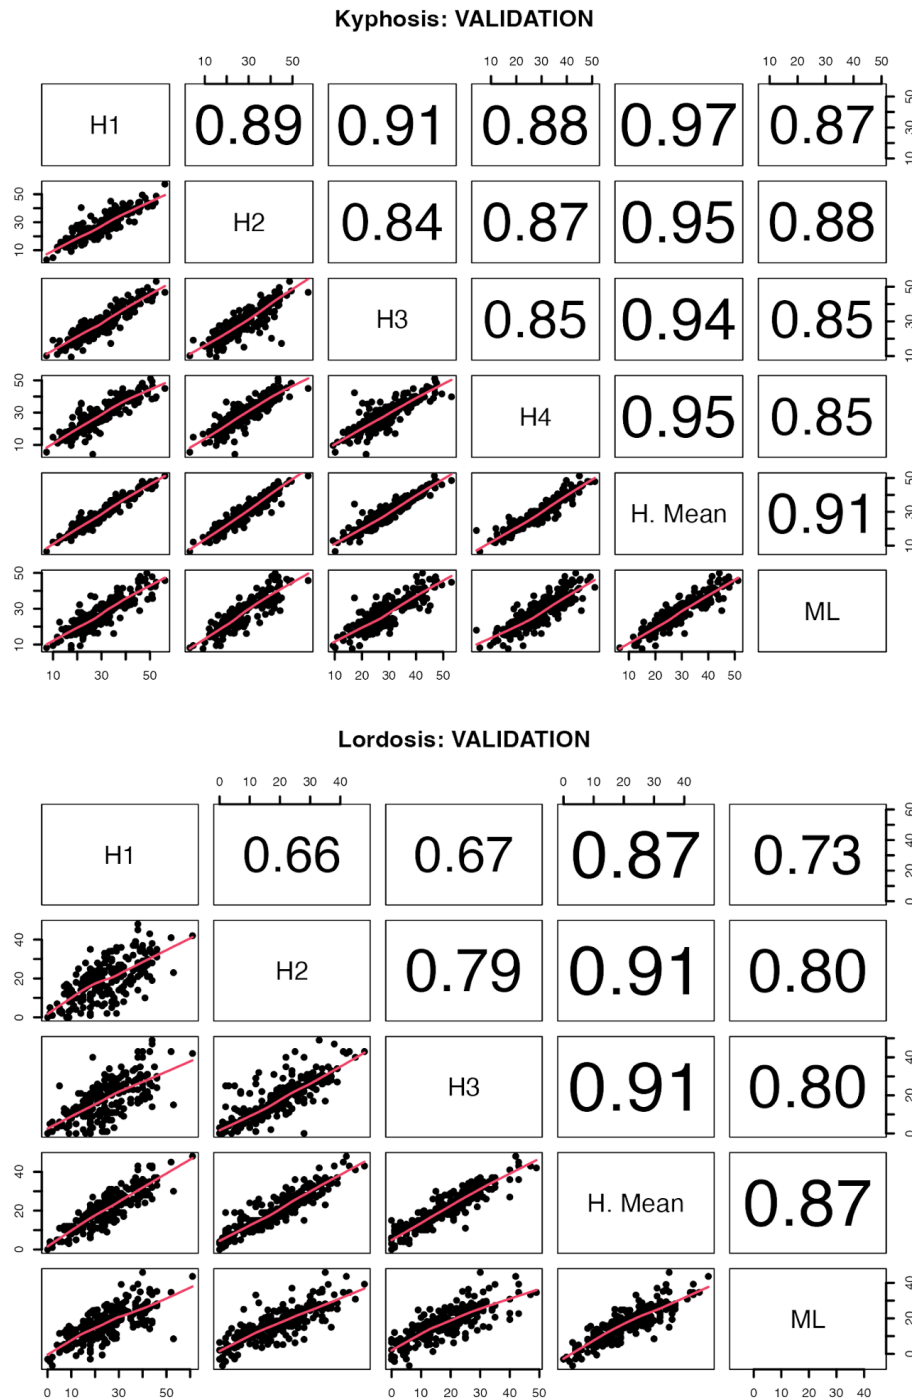

**Supplementary Figure 2. Correlation between kyphosis and lordosis angle.** The blue line indicates the non-linear loess positive association between the two traits. Gray shading is the 95% confidence interval of the nonlinear association.

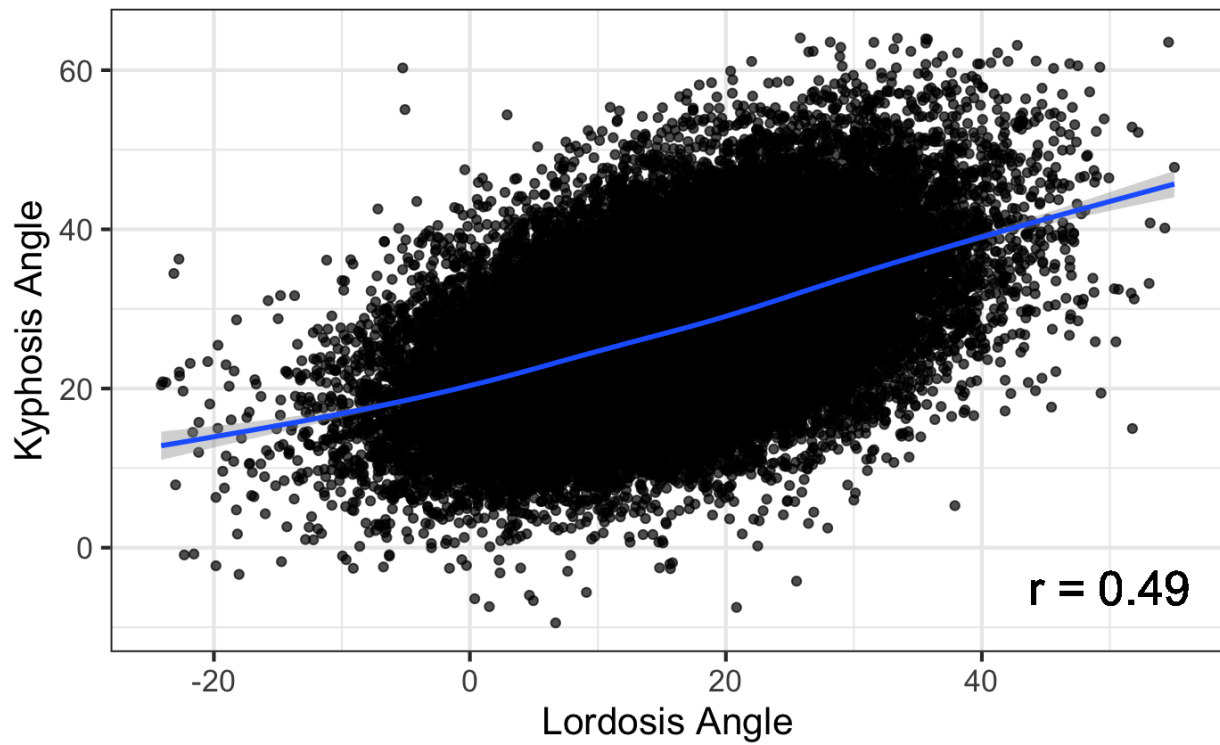

**Supplementary Figure 3. Sex-stratified associations between prior diseases and kyphotic/lordotic angle.** All analyses were adjusted by age at visit, BMI, smoking status, and Townsend deprivation index.

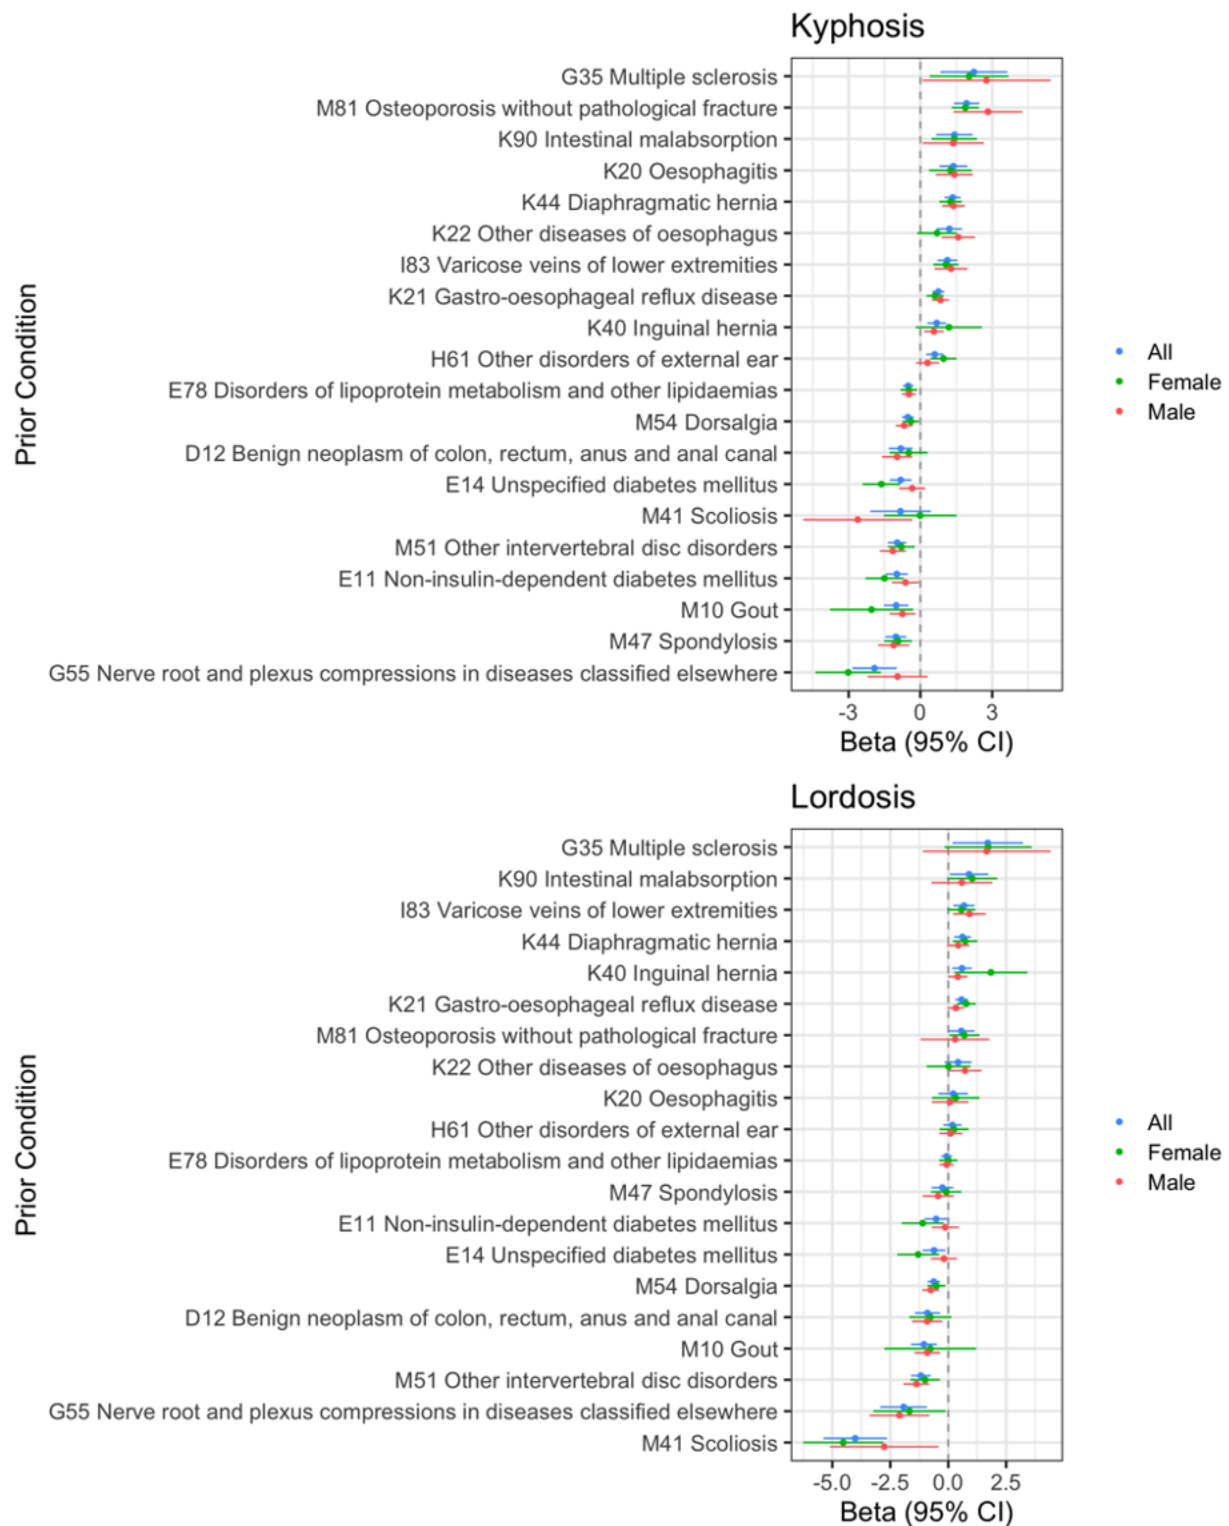

**Supplementary Figure 4. Nonlinear associations between kypholordotic angles and adjusted probabilities of pre-existing comorbidities A) Positive associations B) Inverse associations.** Red star annotations indicate significant association in adjusted linear regression models. Analyses adjusted by age at visit, BMI, smoking status, and Townsend deprivation index.

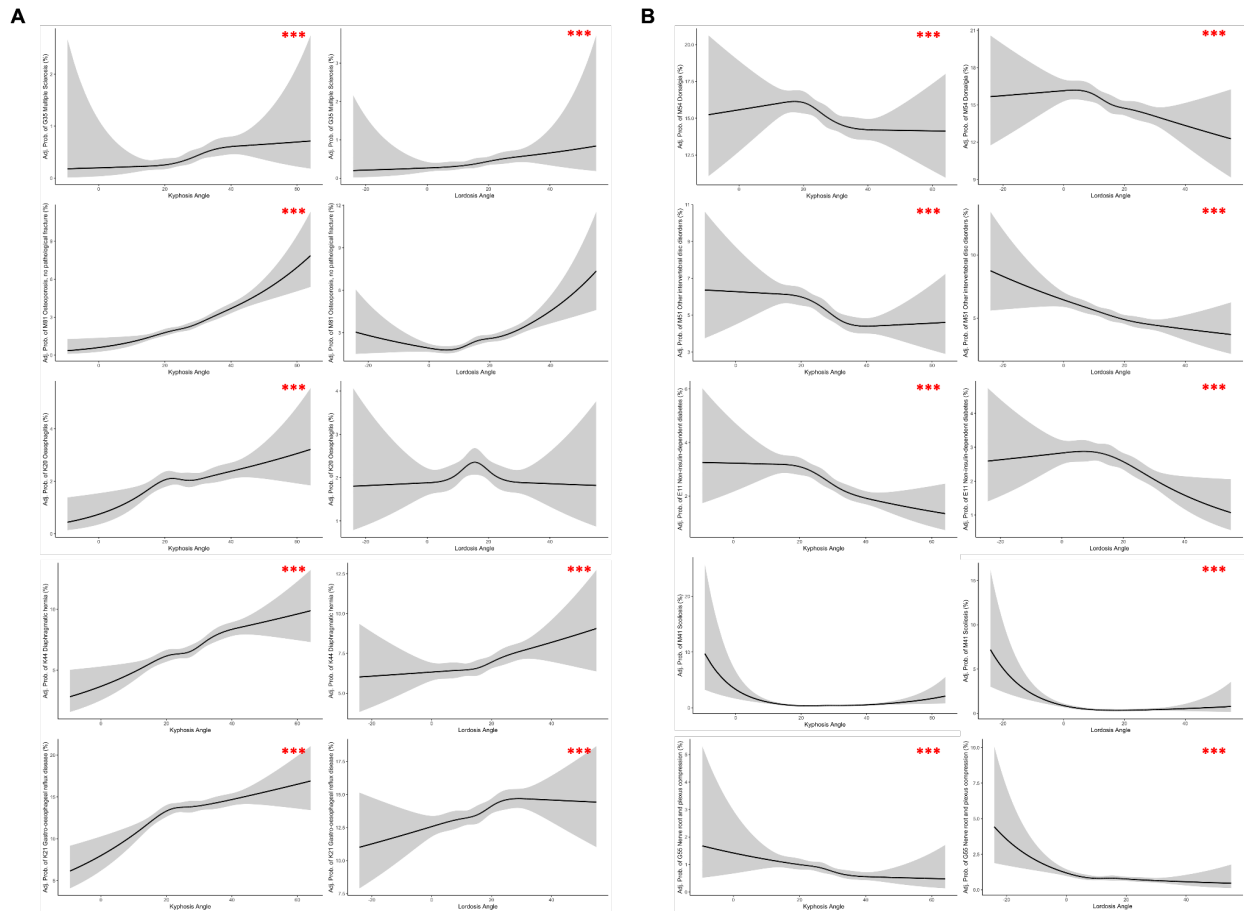

**Supplementary Figure 5. Sex-stratified associations between serum biochemistry and kyphotic/lordotic angle.** All analyses were adjusted by age at visit, BMI, smoking status, and Townsend deprivation index.

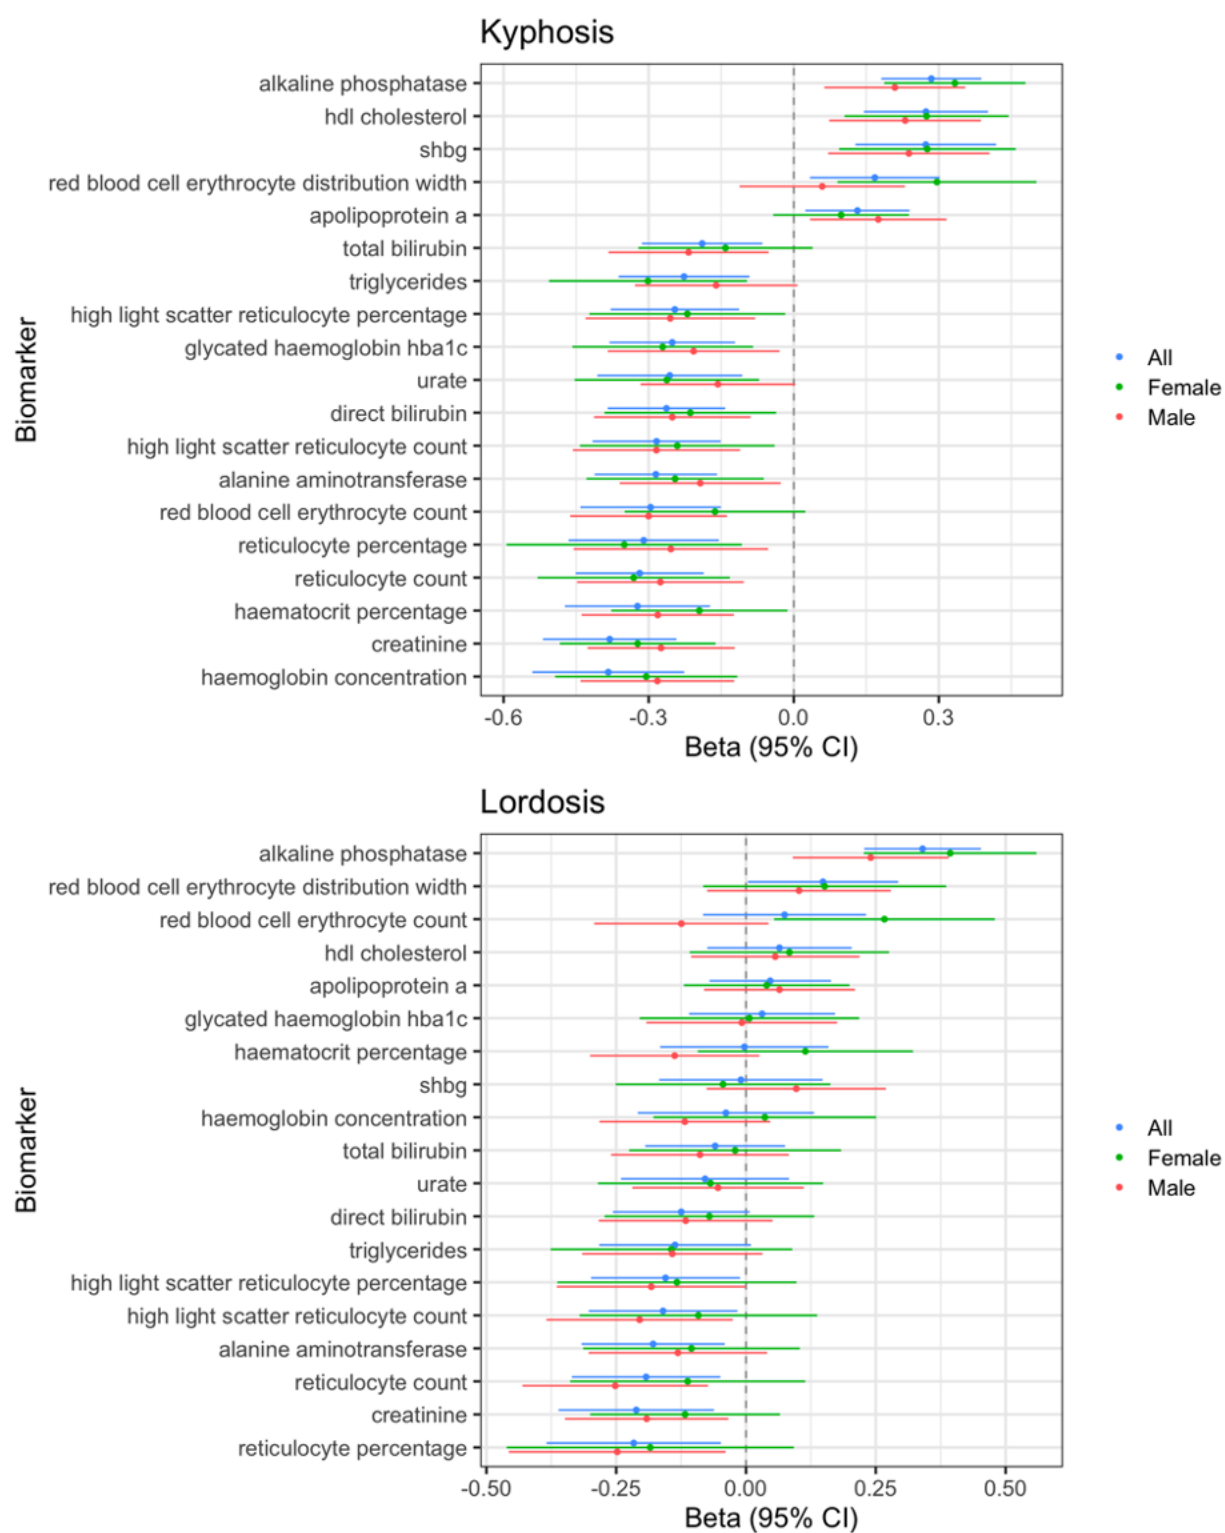

**Supplementary Figure 6. Non-linear sex-stratified correlations between musculoskeletal traits with kyphosis and lordosis angles.**

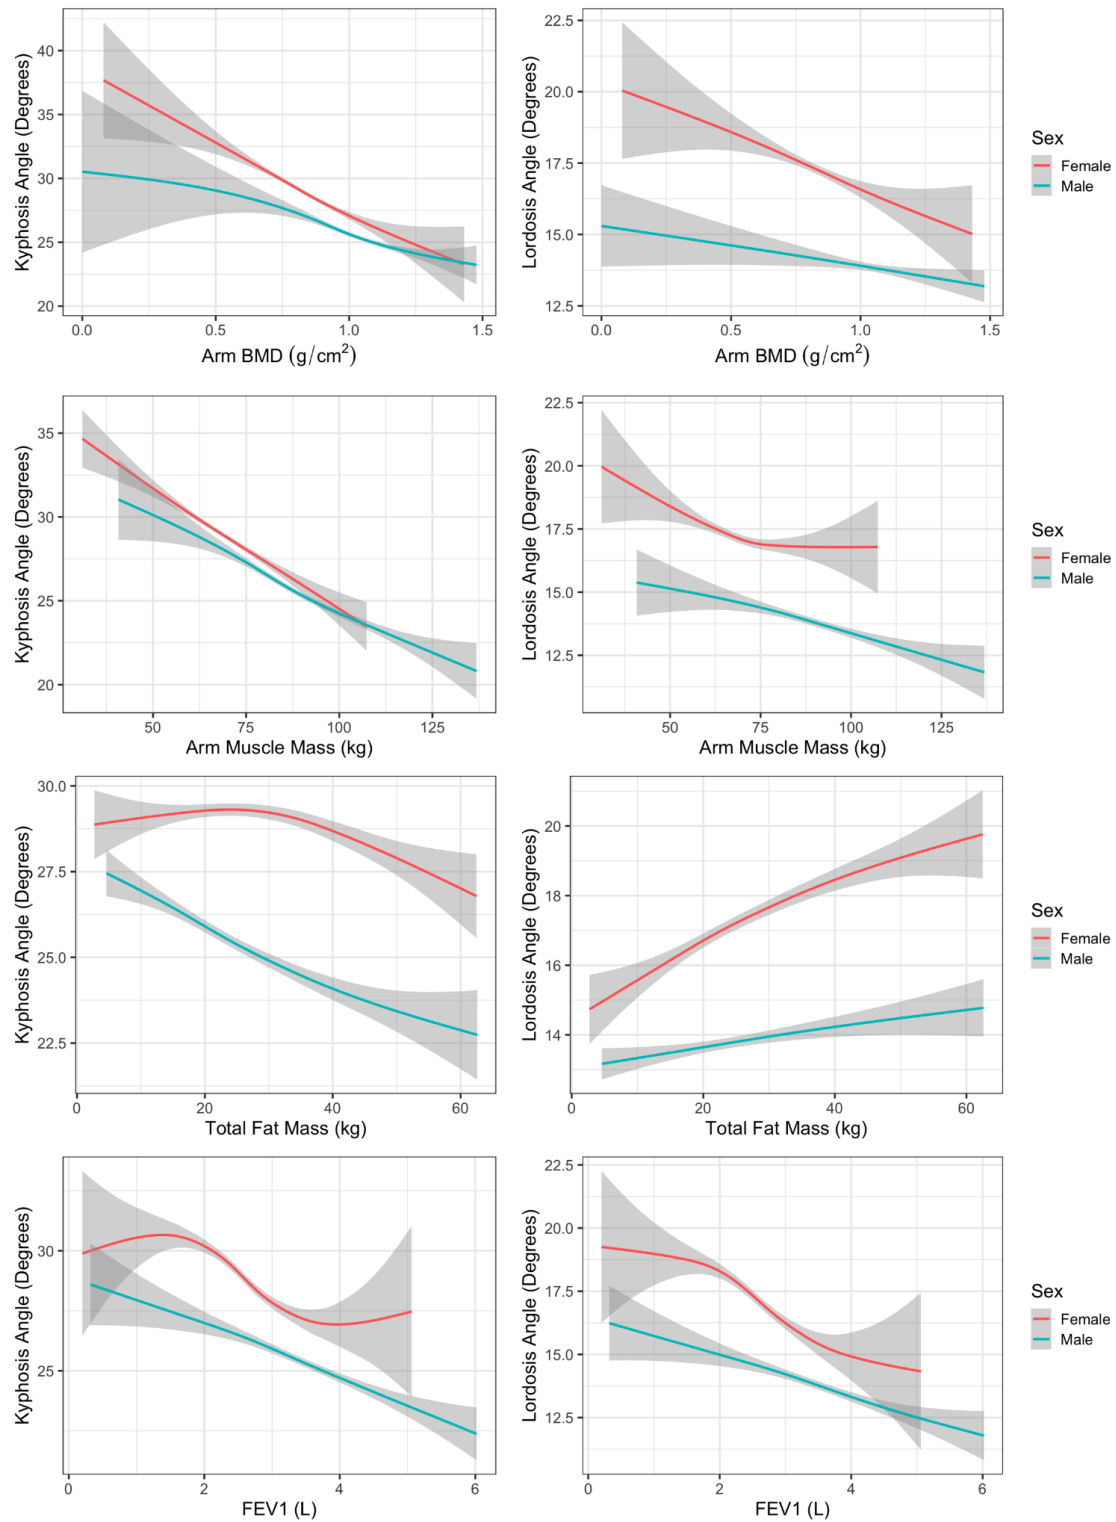

**Supplementary Figure 7: Association between adiposity and kypholordotic angles.**  
Adjusted models of kyphosis and lordosis accounting for age, respective angle, scale  
Townsend deprivation index, and scaled total fat.

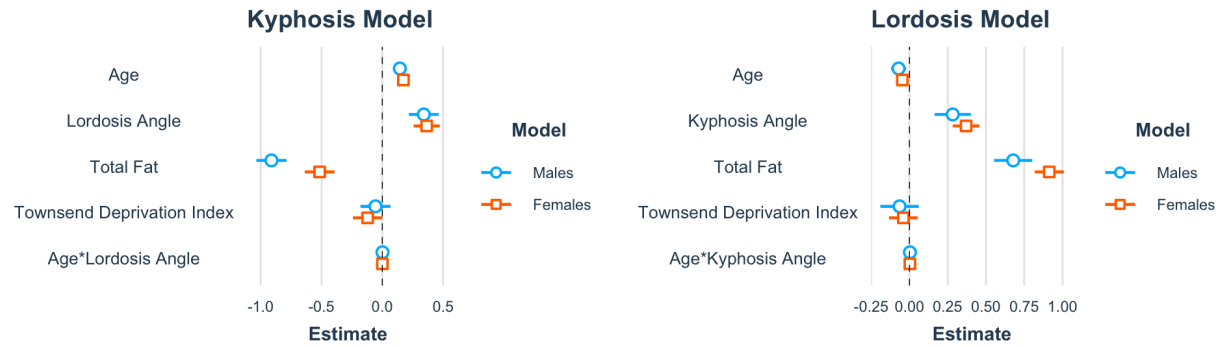

**Supplementary Figure 8. Sex-stratified associations between musculoskeletal traits and kyphotic/lordotic angle.** Analyses were adjusted by age at visit, sex, BMI, smoking status, and Townsend deprivation index, except BMI, height, total fat mass, and visceral adipose tissue were not adjusted for BMI.

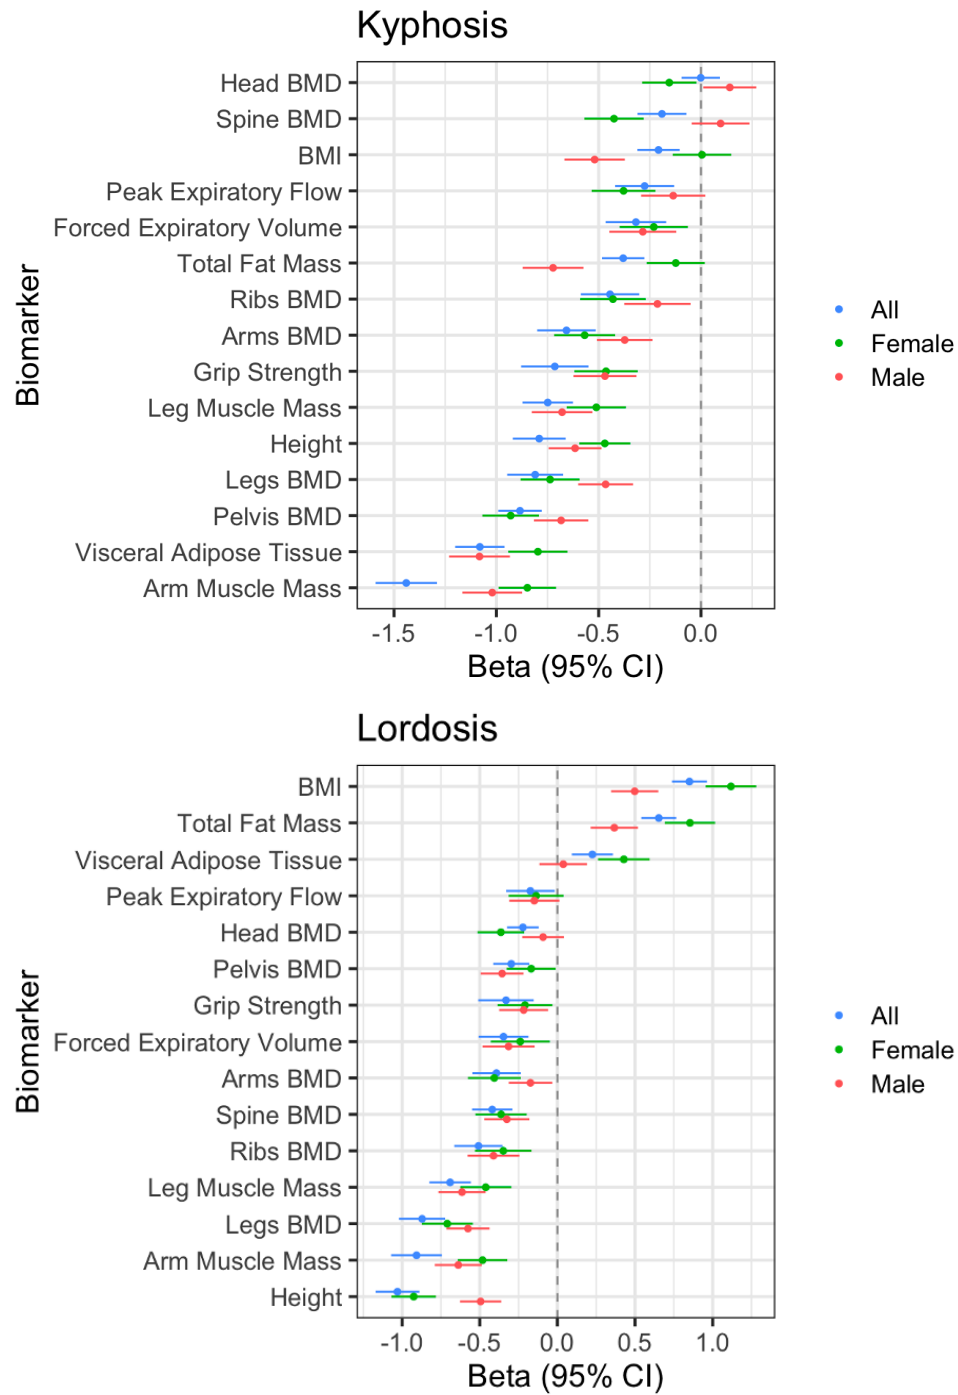

Supplementary Figure 9. Non-MTAG GWAS for kyphosis and lordosis with fine-mapped lead SNPs annotated.

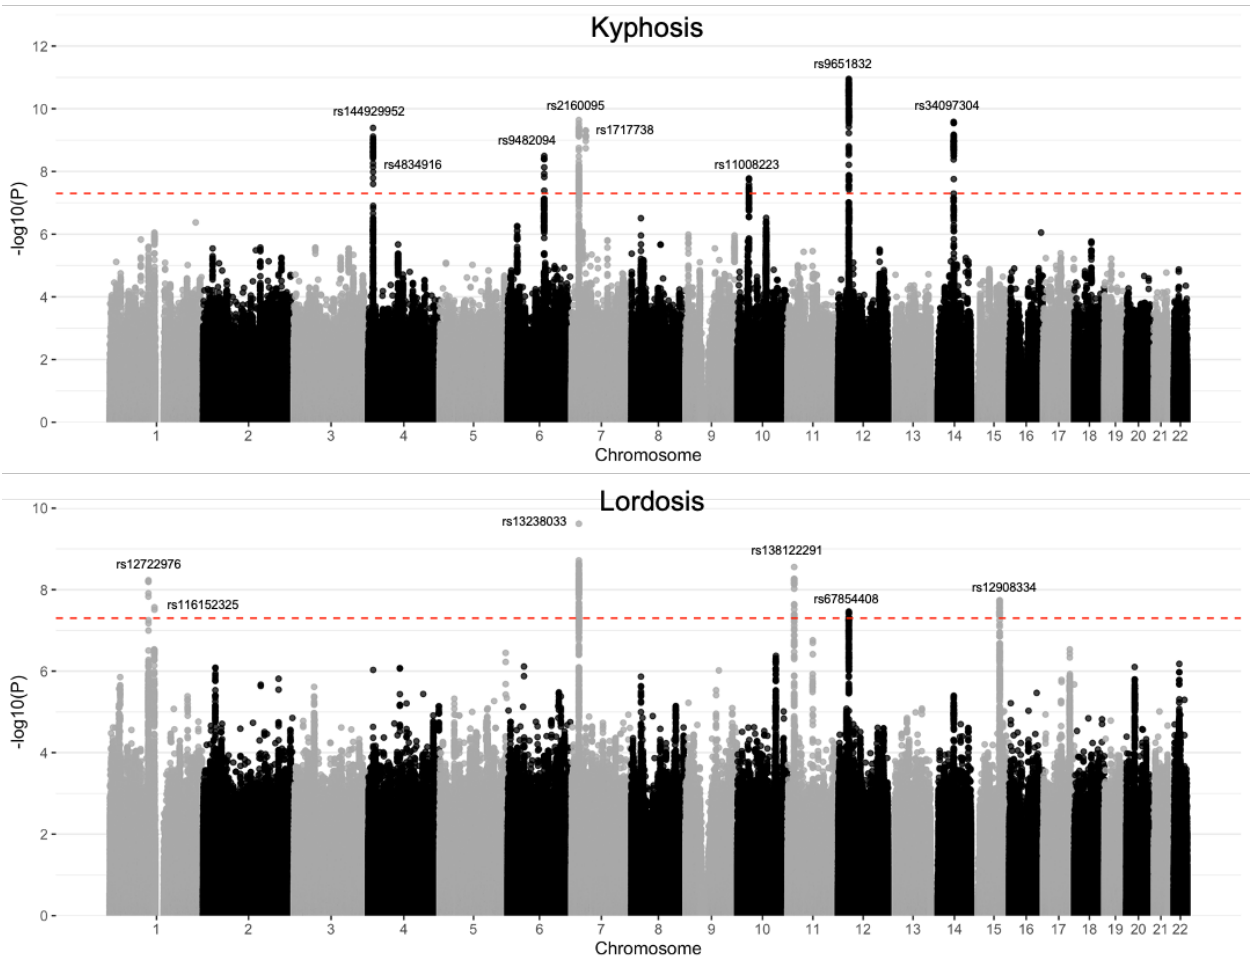

**Supplementary Figure 10. PheWAS plots of significant kypholordosis loci from the GWASAtlas.** Loci identified by GWAS were associated predominantly with skeletal, respiratory and metabolic traits. Only SNPs with significant trait associations ( $p < 5E-8$ ) are displayed.

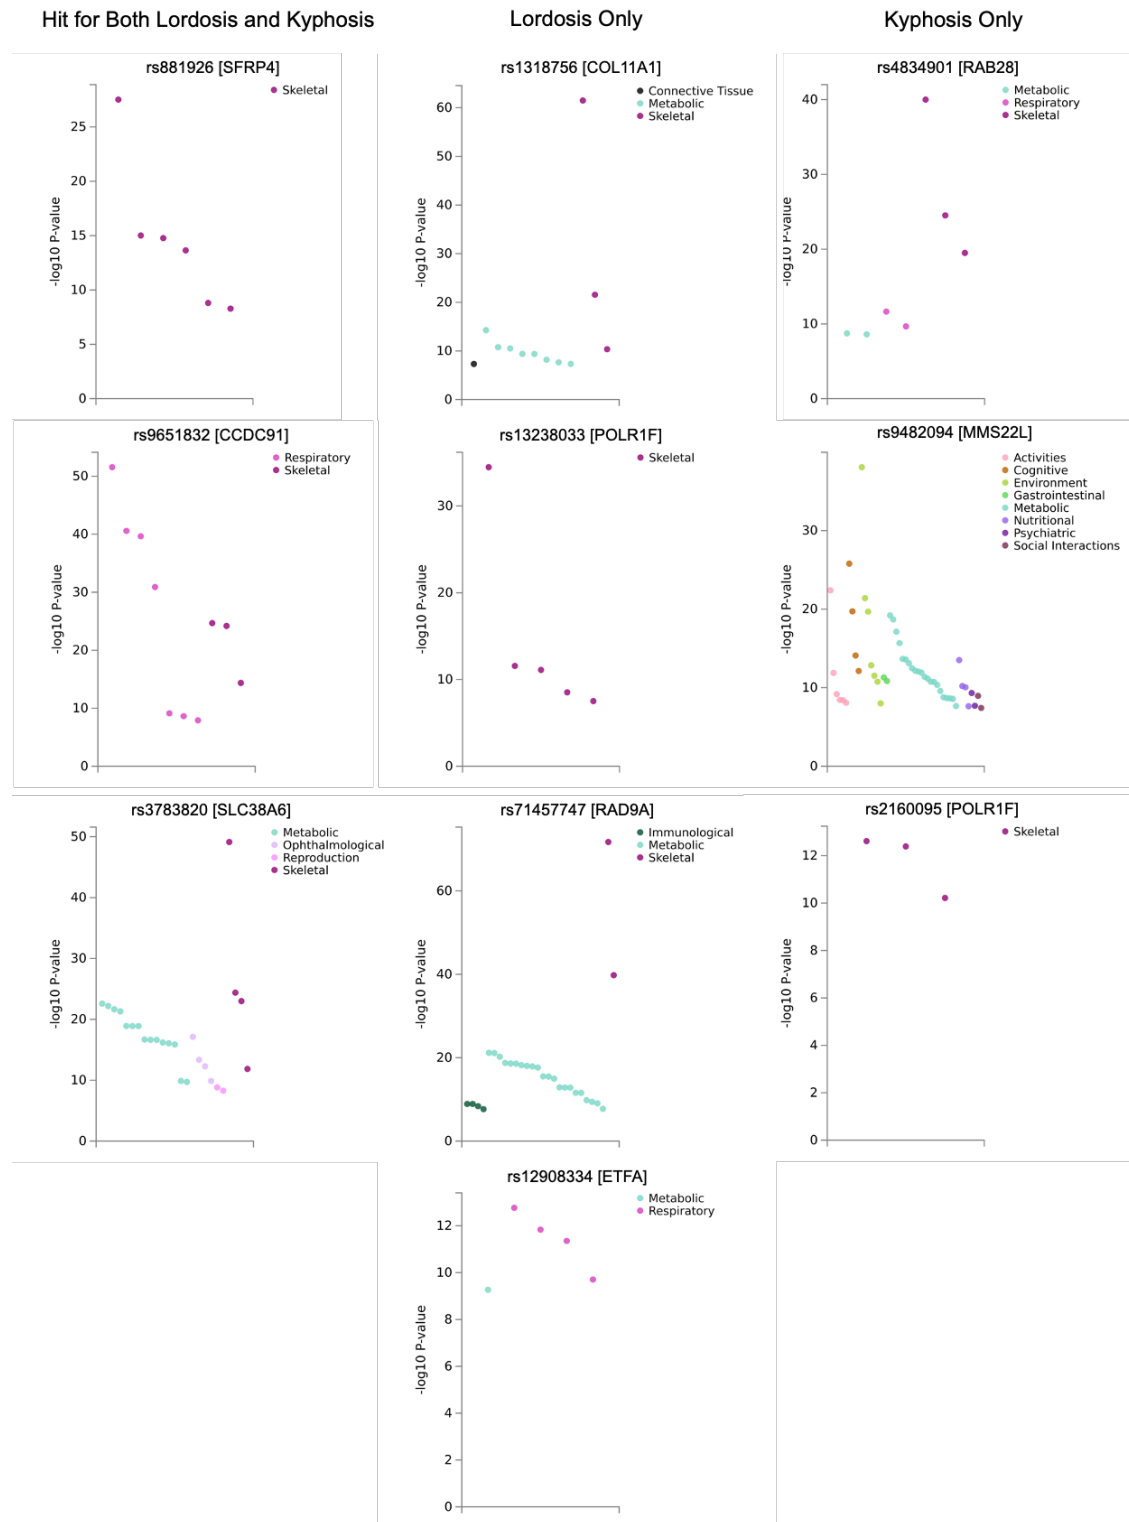

Supplement: Supplementary file [file media-2.pdf]
